# Supplementary material for: Resolving deep relationships of PACMAD grasses: a phylogenomic approach
Source: PubMed Central journal article supplement (PMC4498559; doi:10.1186/s12870-015-0563-9), 2015-07-11

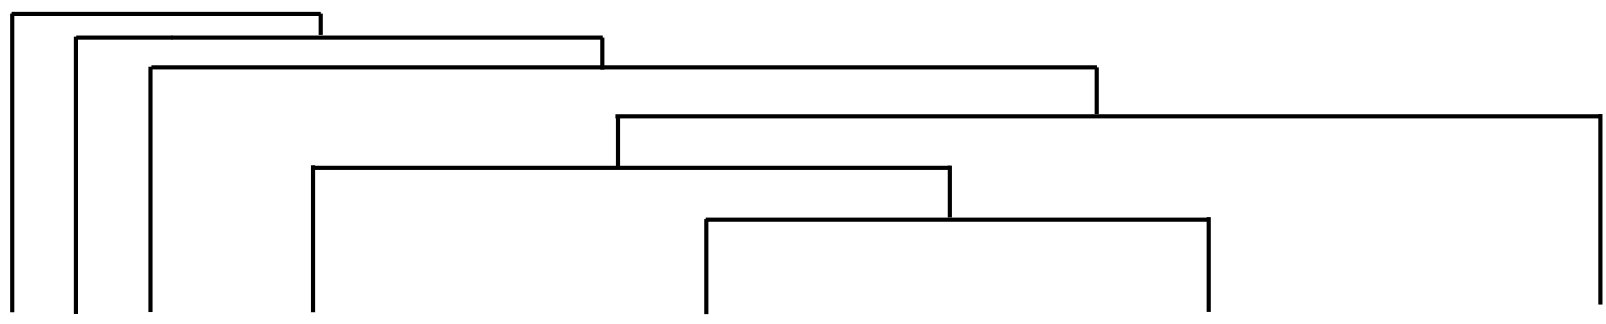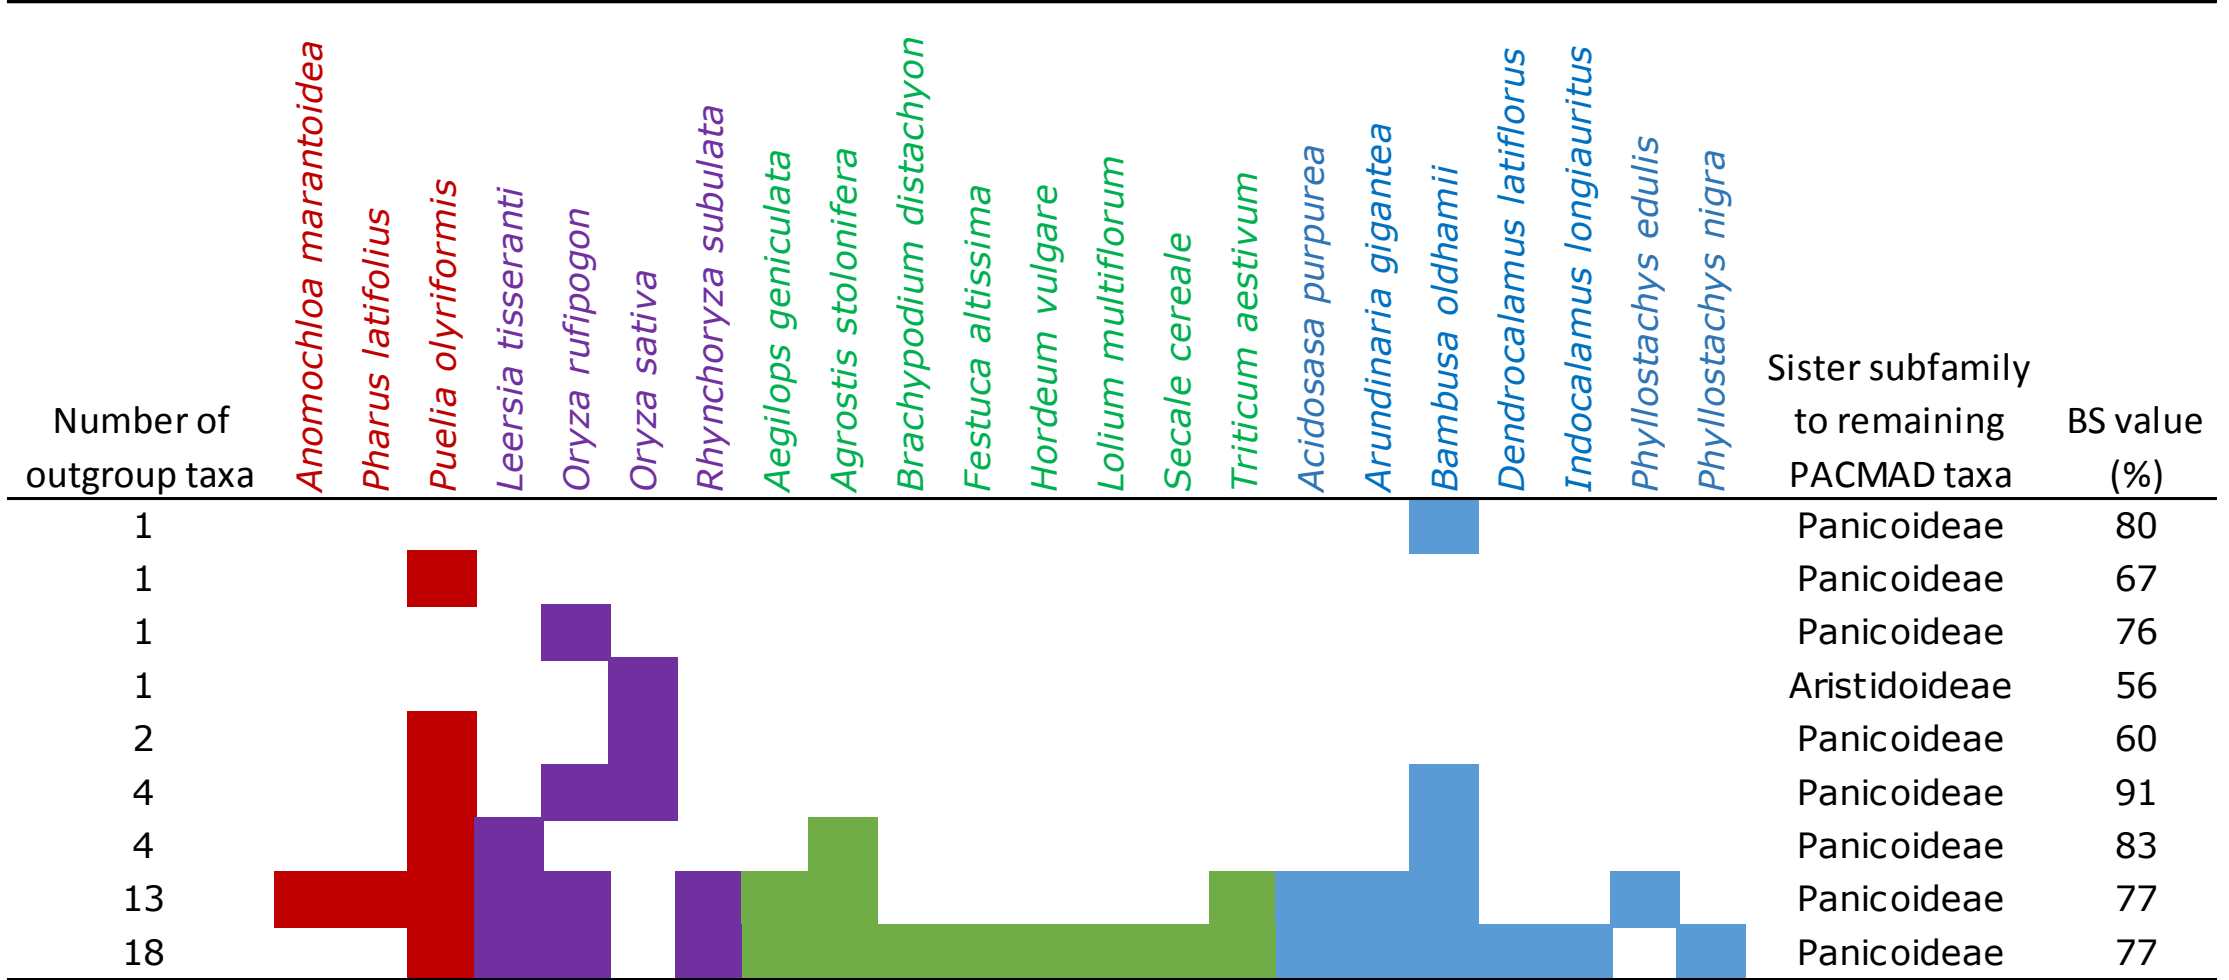

Supplement: 12870_2015_563_MOESM1_ESM.pdf [file 12870_2015_563_MOESM1_ESM.pdf]
